# Supplementary material for: A thermoresponsive fluorophore based on a photochromic diarylethene having donor–acceptor moieties
Source: Royal Society of Chemistry journal article supplement (doi:10.1039/d0cc02411b), 2020-01-01
Supplement: d0cc02411b1.pdf [file d0cc02411b1.pdf]

## Electronic Supplementary Information

### A thermoresponsive fluorophore based on a photochromic diarylethene having donor-acceptor moieties

Sakiko Takeuchi, Tetsuya Nakagawa\* and Yasushi Yokoyama\*

Department of Chemistry and Life Science, Graduate School of Engineering Science,

Yokohama National University, 79-5, Tokiwadai, Hodogaya-ku, Yokohama 240-8501, Japan

E-mail address: [tnakagawa@ynu.ac.jp](mailto:tnakagawa@ynu.ac.jp), [yokoyama-yasushi-wp@ynu.ac.jp](mailto:yokoyama-yasushi-wp@ynu.ac.jp)

#### Contents

1. Experimental Details
2. Synthesis details
  - 2-1. Synthesis of **1o**
3. Experimental data
  - 3-1 <sup>1</sup>H NMR spectrum of **1o**
  - 3-2 <sup>13</sup>C NMR spectrum of **1o**
  - 3-3 EI-Mass spectrum of **1o**
  - 3-4 Fluorescence spectral change of **1**
  - 3-5 DFT calculation results of **1o** and **1o-H<sup>+</sup>**
  - 3-6 Fluorescence spectrum of **1o-H<sup>+</sup>**
4. References

## 1. Experimental details

### General

$^1\text{H}$  and  $^{13}\text{C}$  NMR Spectrum was recorded in deuteriochloroform ( $\text{CDCl}_3$ ) on 500 MHz NMR spectrometers (DRX500, Bruker and ECA500, JEOL).  $J$  values are expressed in Hz and quoted chemical shifts are in ppm. Splitting patterns are indicated as s, singlet; d, doublet; t, triplet; q, quartet, m, multiplet. High-resolution mass spectrum was measured by an electrospray ionization mass spectroscopy (NanoFrontierLD, Hitachi High-Technology). Melting points were measured using a Yazawa BY-2 hot stage microscope, and those were uncorrected.

### Optical Measurements

Absorption spectra of **1o** in toluene ( $2.07 \times 10^{-5} \text{ mol dm}^{-3}$ ) were measured on a UV-visible spectrophotometer (V-550, JASCO). Fluorescence spectra of **1o** in toluene ( $2.05 \times 10^{-5} \text{ mol dm}^{-3}$ ) were measured on a spectrofluorometer (FP-8300, JASCO). Photochemical reaction was carried out in a quartz cell with 10 nm optical path length. Photoirradiation with 366 nm light was carried out using a 500 W high-pressure mercury lamp (USHIO USH-500D), separated by filters (a 5 cm water filter, a 5 cm  $\text{CuSO}_4$  aq filter, a UV-35 filter and a UV36A filter). Photoirradiation with 578 nm light was carried out using a 500 W xenon lamp (USHIO, UXL-500D), separated by filters (a 5 cm water filter, an O-57 glass filter and a KL-56 glass filter). High performance liquid chromatography equipped with a UV/Vis detector (X-LC 3070UV, JASCO) and a silica gel column (ZORBAX Rx-Sil RRHT, Agilent) was used to determine the concentration of isomers during photoirradiation. Photocyclization and photo cycloreversion quantum yields were determined with the procedures described elsewhere.<sup>1)</sup>

### Computational Details

DFT geometry optimization and the energy calculation of **1o** and **1o-H<sup>+</sup>** were carried out with the Spartan'18 (Wavefunction) employing the three-parameter hybrid functional of Becke based on the correlation functional of Lee, Yang and Parr (B3LYP). The 6-31G\* basis sets were used for all atoms.

## 2. Synthesis details

### 2-1. Synthesis of **1o**

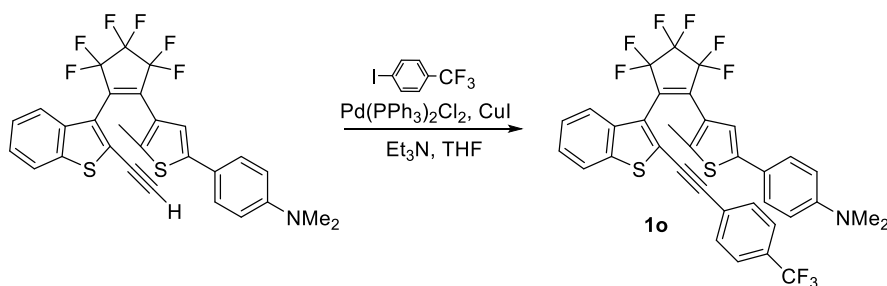

A solution of 4-(4-(2-(2-ethynylbenzo[b]thiophen-3-yl)-3,3,4,4,5,5-hexafluorocyclopent-1-en-1-yl)-5-methylthiophen-2-yl)-N,N-dimethylaniline<sup>2</sup>) (49.0 mg, 0.09 mmol, 1.0 eq), 1-iodo-4-(trifluoromethyl)benzene (0.02 mL, 0.14 mmol, 1.5 eq), Pd(PPh<sub>3</sub>)<sub>2</sub>Cl<sub>2</sub> (3.6 mg, 0.02 mmol, 0.2 eq) and CuI (7.9 mg, 0.01 mmol, 0.1 eq) in Et<sub>3</sub>N (1 mL) and THF (1 mL) was stirred for overnight at room temperature. The reaction was quenched by adding 3 mol dm<sup>-3</sup> aq.HCl, and the resultant mixture was extracted with ethyl acetate. The combined organic layer was dried over anhydrous Na<sub>2</sub>SO<sub>4</sub>, the drying agent filtered off, and evaporated. The residue was purified by column chromatography on silica gel using ethyl acetate/ hexane (3 %) as the eluent, to give 38.8 mg (0.056 mmol) of **1o** as a pale yellow solid in 63% yield.

<sup>1</sup>H NMR (500 MHz, CDCl<sub>3</sub>, TMS) δ/ppm: 1.85 (3H, s) 2.95 (6H, s) 6.55 (2H, d, J=8.83 Hz) 6.90 (1H, s) 7.00 (2H, d, J=6.74 Hz) 7.46 (2H, m) 7.52 (2H, d, J=8.50 Hz) 7.57 (2H, d, J=8.20 Hz) 7.74 (1H, d, J=7.57 Hz) 7.81 (1H, m).

<sup>13</sup>C NMR (125 MHz, CDCl<sub>3</sub>, TMS) δ/ppm: 14.76, 40.41, 83.48, 98.01, 112.31, 120.36, 121.56, 122.42, 122.85, 123.37, 123.42, 124.69, 125.02, 125.09, 125.55, 125.57, 125.60, 125.63, 125.87, 126.36, 126.62, 128.65, 130.71 (q), 131.98, 136.65, 139.57, 142.47, 150.14.

ESI-MS [M]<sup>+</sup>: calcd. for C<sub>35</sub>H<sub>23</sub>NF<sub>9</sub>S<sub>2</sub>: 692.1123; found: 692.1203.

IR (neat) ν/ cm<sup>-1</sup>: 513, 537, 584, 729, 753, 809, 843, 892, 954, 975, 1016, 1064, 1075, 1101, 1127, 1167 1190, 1258, 1276, 1320, 1340, 1485, 1523, 1609, 2319, 2352, 2370, 2801, 2855, 2894, 2925, 2958.

M.p. = 161.1-162.2 °C.

### 3. Experimental data

#### 3-1 <sup>1</sup>H NMR spectrum of **1o**

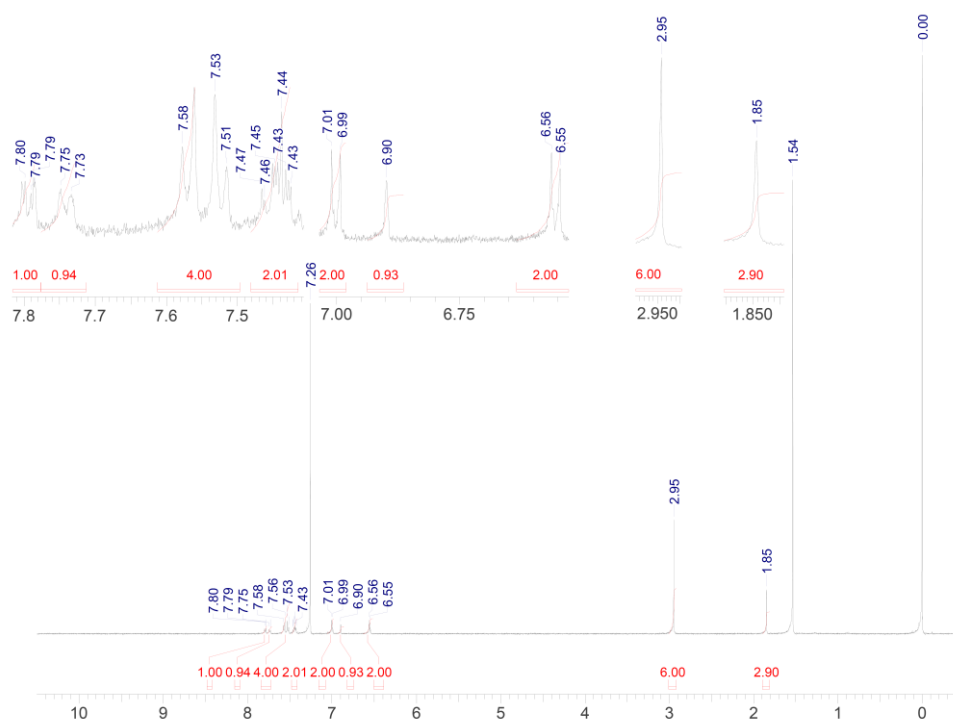

Fig. S1 <sup>1</sup>H NMR spectrum of **1o**.

3-2  $^{13}\text{C}$  NMR spectrum of **1o**

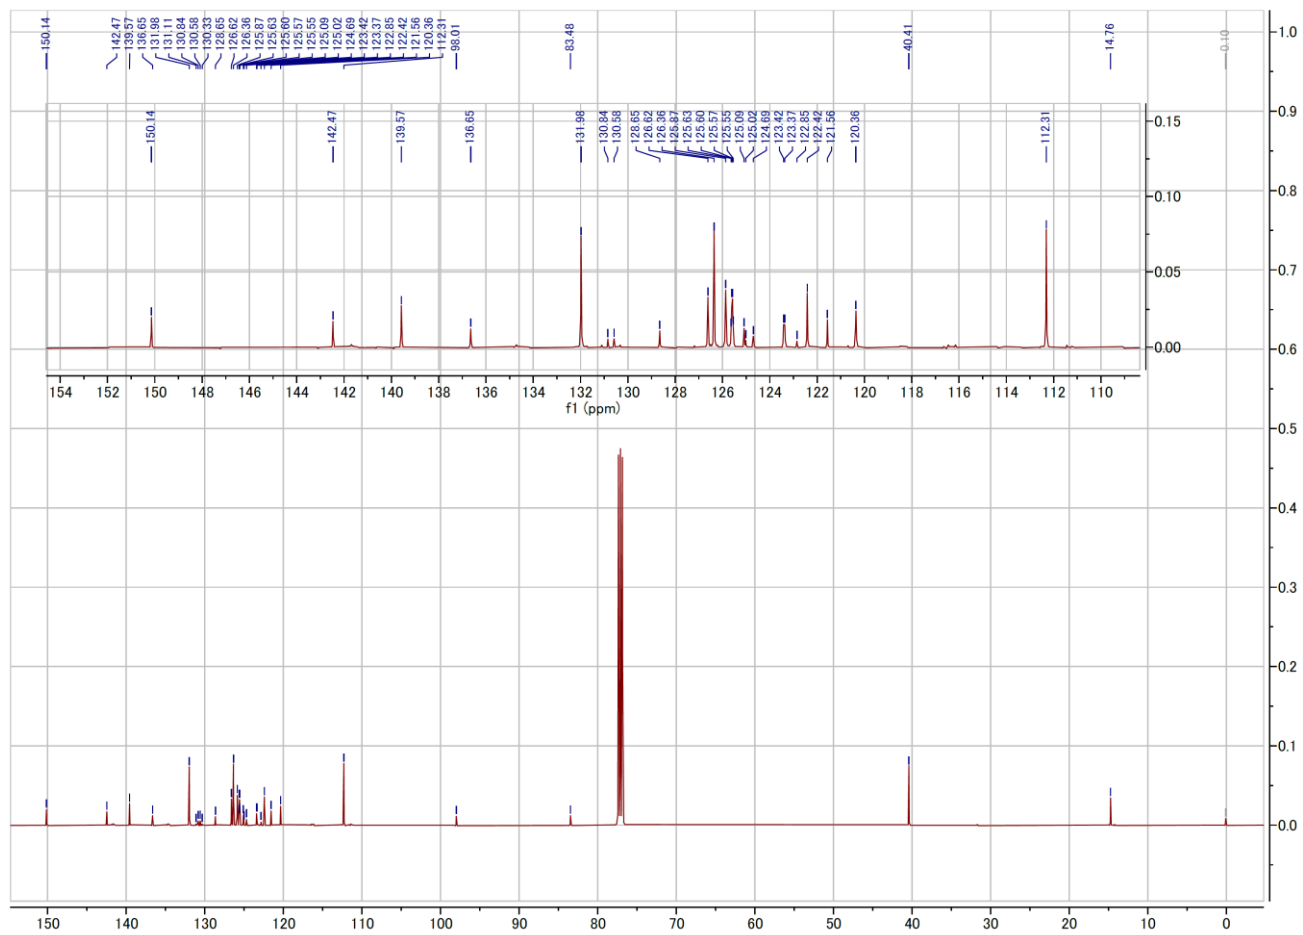

Fig. S2  $^{13}\text{C}$  NMR spectrum of **1o**.

### 3-3 ESI-Mass spectrum of **1o**

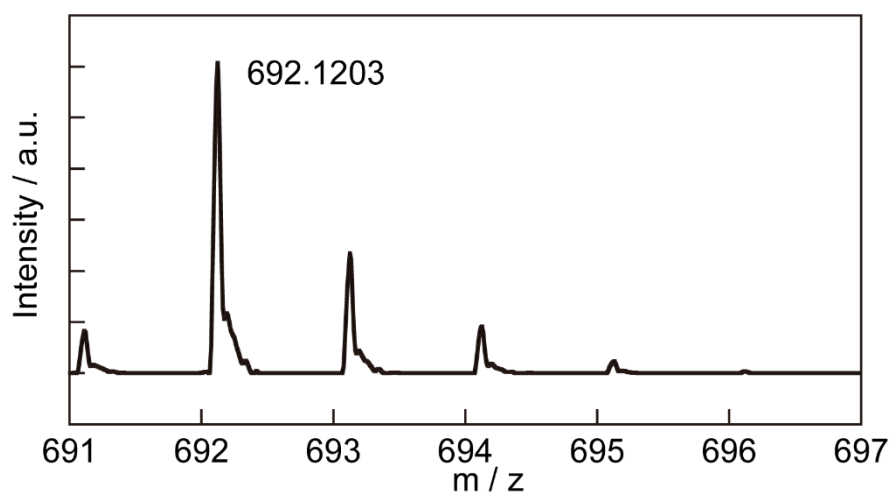

Fig. S3 ESI-Mass spectrum of **1o**.

### 3-4 Fluorescence spectral change of **1o**

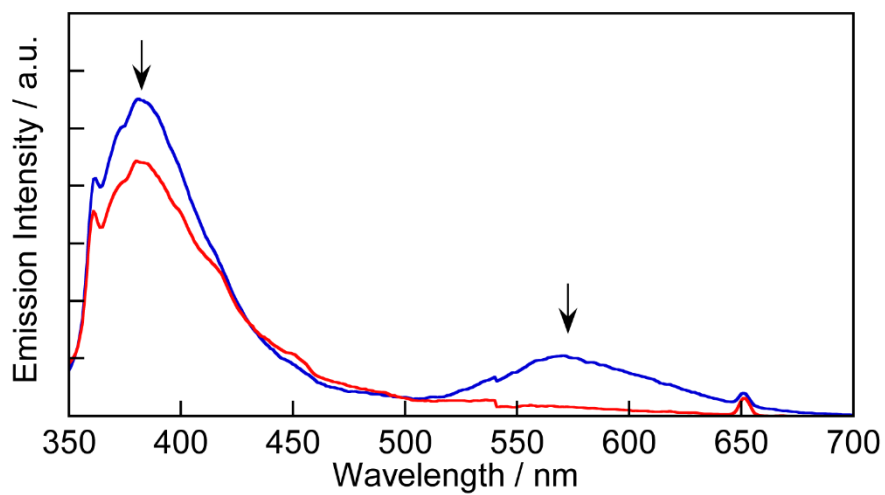

Fig. S4 Fluorescence spectral change of **1o** (blue line) and **1** in **pss** (red line) in toluene ( $2.05 \times 10^{-5} \text{ mol dm}^{-3}$ ) upon irradiation with a 366 nm light. Excitation wavelength: 326 nm.

3-5 DFT calculation results of **1o** and **1o-H<sup>+</sup>**

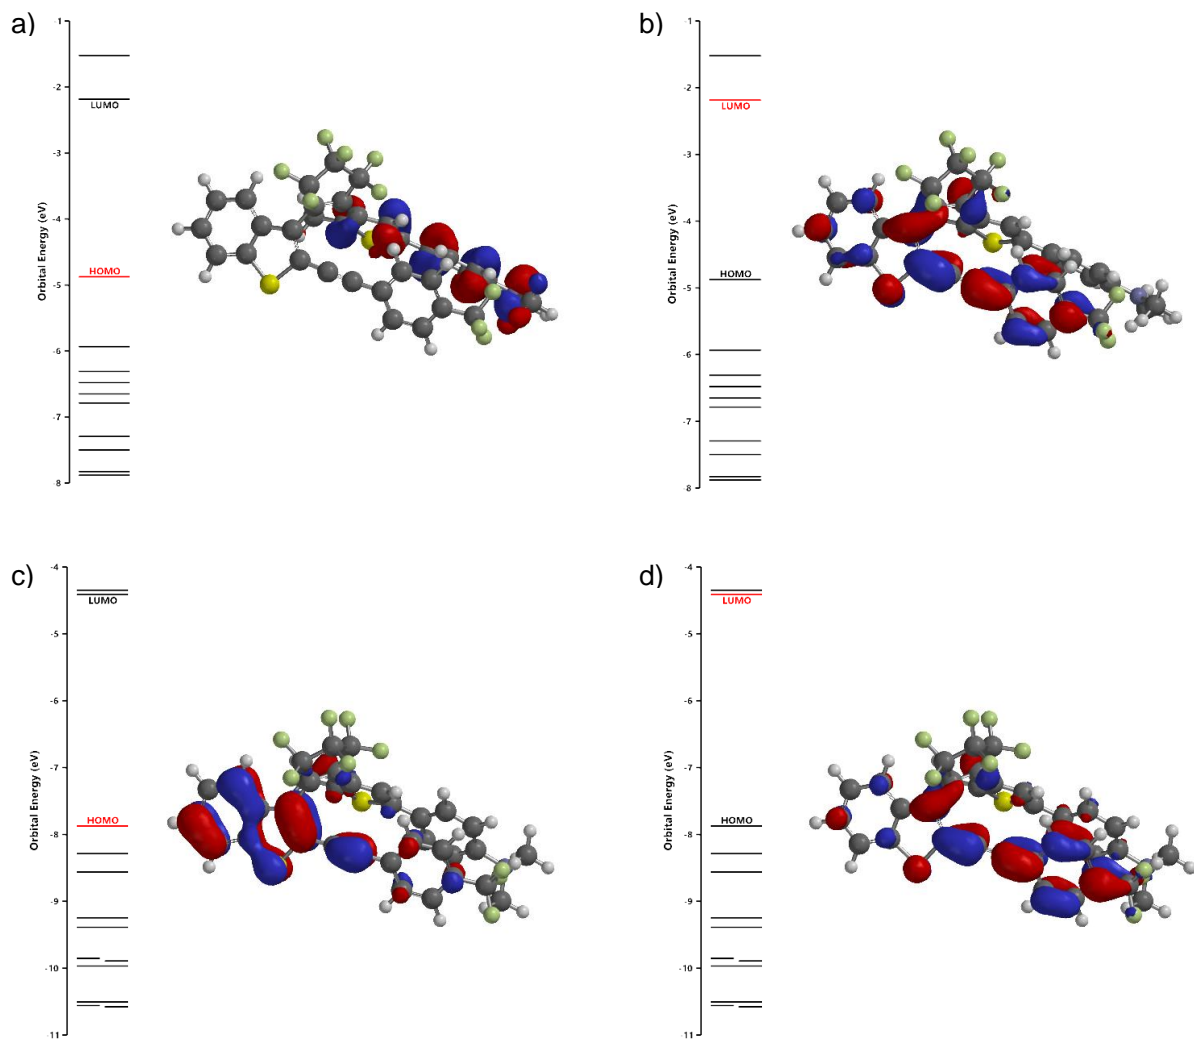

Fig. S5 HOMO and LUMO of **1o** and **1o-H<sup>+</sup>** calculated at B3LYP/6-31G\* level.

a) HOMO of **1o**. b) LUMO of **1o**. c) HOMO of **1o-H<sup>+</sup>**. d) LUMO of **1o-H<sup>+</sup>**.

### 3-6 Fluorescence spectrum of **1o-H<sup>+</sup>**

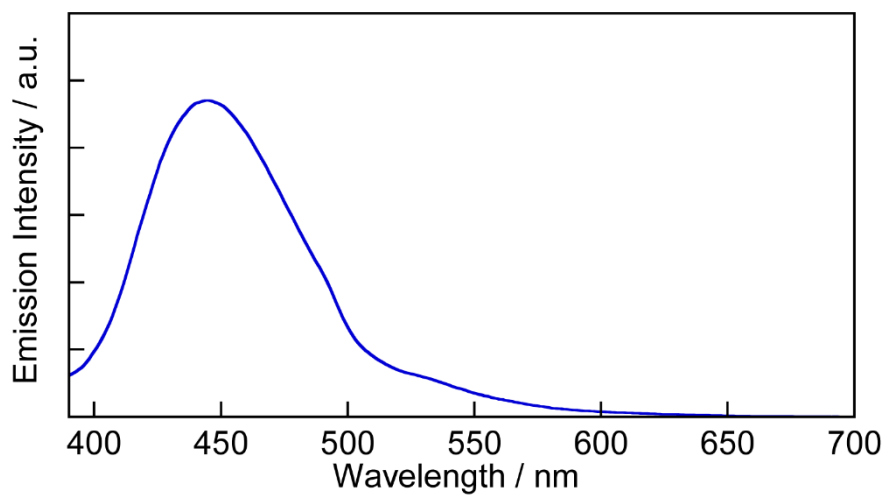

Fig. S6 Fluorescence spectrum of **1o-H<sup>+</sup>** in toluene ( $2.07 \times 10^{-5}$  mol dm<sup>-3</sup>).

Excitation wavelength: 326 nm.

### 4. References

- 1) Y. Yokoyama, T. Inoue, M. Yokoyama, T. Goto, T. Iwai, N. Kera, I. Hitomi, Y. Kurita, *Bull. Chem. Soc. Jpn.*, 1994, **67**, 3297.
- 2) S. Mahvidi, S. Takeuchi, S. Kusumoto, H. Sato, T. Nakagawa and Y. Yokoyama, *Org. Lett.*, 2016, **18**, 5042.
